# Supplementary material for: Averaged decrease in SpO2 during six-minute walk test as a novel prognostic marker for elderly heart failure patients
Source: Research Square preprint supplement (doi:10.21203/rs.3.rs-4173768/v1), 2024-04-18
Supplement: Supplementary file 1 [file 37db22cc81f91b77f3c60753.docx]

**Table S1: Cut off values of ΔSpO2-Ex and 6MWD**

| **Parameters** | **Cut off value** | **AUC** | **Sensitivity** | **Specificity** |
| --- | --- | --- | --- | --- |
| ΔSpO2-Ex (%) | 6.7 | 0.72 | 0.57 | 0.96 |
| 6MWD (m) | 220 | 0.62 | 0.68 | 0.63 |

6MWD, Six-Minute Walk Distance; ΔSpO2-Ex, averaged decrease in peripheral oxygen saturation during exercise; AUC, area under the curve.

**Table S2: Baseline characteristics of Long- and Short-6MWD groups**

| **Characteristics** | **All** | **Long-6MWD** | **Short-6MWD** | **P value** |
| --- | --- | --- | --- | --- |
| Subjects, n | 55 | 26 | 29 | - |
| Age, y | 80.7 ± 6.7 | 79.2 ± 6.7 | 82.2 ± 6.6 | 0.098 |
| Gender (Female) | 25 (45%) | 9 (35%) | 16 (55%) | 0.177 |
| Body mass index, kg/m2 | 21.3 ± 4.3 | 21.0 ± 3.4 | 21.6 ± 5.0 | 0.614 |
| Vital signs |  |  |  |  |
| Heart rate, beats per minute | 73.0 ± 15.4 | 71.7 ± 15.7 | 74.2 ± 15.3 | 0.556 |
| Systolic blood pressure, mmHg | 111.2 ± 19.0 | 112.5 ± 18.6 | 110.0 ± 19.7 | 0.640 |
| Diastolic blood pressure, mmHg | 63.2 ± 11.5 | 62.8 ± 12.2 | 62.4 ± 11.0 | 0.882 |
| Medical history |  |  |  |  |
| Coronary artery disease, n | 24 (44%) | 15 (58%) | 9 (31%) | 0.060 |
| Valvular disease, n | 23 (42%) | 7 (27%) | 16 (55%) | 0.055 |
| Atrial fibrillation, n | 31 (56%) | 16 (62%) | 15 (52%) | 0.588 |
| Hypertension, n | 45 (82%) | 19 (73%) | 26 (90%) | 0.164 |
| Diabetes mellitus, n | 16 (29%) | 7 (27%) | 9 (31%) | 0.775 |
| Pulmonary disease, n | 12 (22%) | 5 (19%) | 7 (24%) | 0.751 |
| Laboratory measurements |  |  |  |  |
| NT-proBNP (pg/mL) | 3084  (1373, 5781) | 1690  (1078, 4038) | 4332  (2322, 6146) | 0.006 |
| Creatinine (mg/dL) | 1.8 ± 1.3 | 1.6 ± 0.8 | 2.0 ± 1.6 | 0.363 |
| eGFR (mL/min/1.73 m2) | 34.3 ± 18.3 | 36.3 ± 17.3 | 32.5 ± 19.2 | 0.448 |
| Hematocrit (%) | 35.8 ± 6.1 | 37.7 ± 5.7 | 34.0 ± 6.0 | 0.022 |
| Hemoglobin (g/dL) | 11.5 ± 2.1 | 12.3 ± 2.0 | 10.9 ± 1.9 | 0.008 |
| Echocardiography parameters |  |  |  |  |
| LVEF, % | 45.7 ± 18.0 | 47.3 ± 18.3 | 44.3 ± 17.9 | 0.543 |
| LVDd, mm | 53.9 ± 10.4 | 56.3 ± 10.1 | 51.8 ± 10.5 | 0.107 |
| TRPG, mmHg | 26.3 ± 7.1 | 25.4 ± 7.5 | 26.9 ± 6.9 | 0.533 |
| Pulmonary function tests |  |  |  |  |
| %VC, % | 73.2 ± 22.0 | 82.1 ± 17.8 | 65.0 ± 22.7 | 0.003 |
| FEV 1%, % | 74.5 ± 11.6 | 74.7 ± 11.7 | 74.4 ± 11.8 | 0.913 |
| Drug therapy |  |  |  |  |
| ACE inhibitor or ARB, n | 27 (49%) | 14 (54%) | 13 (45%) | 0.593 |
| MRA, n | 25 (45%) | 14 (54%) | 11 (38%) | 0.285 |
| β-blocker, n | 48 (87%) | 22 (85%) | 26 (90%) | 0.232 |
| SGLT2 inhibitor, n | 14 (25%) | 8 (31%) | 6 (21%) | 0.537 |
| ARNI, n | 14 (25%) | 8 (31%) | 6 (21%) | 0.537 |
| Loop diuretic, n | 50 (91%) | 24 (92%) | 26 (90%) | 1.000 |
| 6-minute walk test |  |  |  |  |
| 6MWD (m) | 237.5 ± 106.7 | 333.3 ± 59.4 | 151.6 ± 51.4 | <0.001 |
| SpO2 at rest (%) | 98.3 ± 1.5 | 98.5 ± 1.7 | 98.2 ± 1.3 | 0.534 |
| SpO2 during the 6MWT (%) | 92.5 ± 4.4 | 93.0 ± 4.1 | 92.1 ± 4.8 | 0.489 |
| ΔSpO2-Ex (%) | 5.8 ± 4.3 | 5.5 ± 3.8 | 6.1 ± 4.7 | 0.617 |

Data are presented as the mean ± SD or median with interquartile range (IQR).

6MWD, Six-Minute Walk Distance; ΔSpO2-Ex, averaged decrease in peripheral oxygen saturation during exercise; ACE, Angiotensin-converting enzyme; ARB, Angiotensin II receptor blockers; ARNI, Angiotensin receptor-neprilysin inhibitor; eGFR, estimated glomerular filtration rate; FEV1 %, Forced expiratory volume in 1 second as a percentage of predicted; LVDd, Left ventricular end-diastolic dimension; LVEF, Left ventricular ejection fraction; MRA, Mineralocorticoid receptor antagonist; NT-proBNP, N-terminal pro b-type natriuretic peptide; SGLT2, Sodium glucose cotransporter 2; TRPG, Tricuspid regurgitant pressure gradient; %VC, Percent vital capacity.

**Table S3: The 6MWD for each trial**

| **Trials** | **6MWD** |
| --- | --- |
| RESOLVD | 381 ± 84 m |
| PRESERVED-HF | 249.0 ± 113.8 m |
| PARALLAX | 303.3 ± 105.4 m |
| INOVATE-HF | 304.1 ± 111.5 m |

6MWD, Six-Minute Walk Distance.

**Figure S1**

**
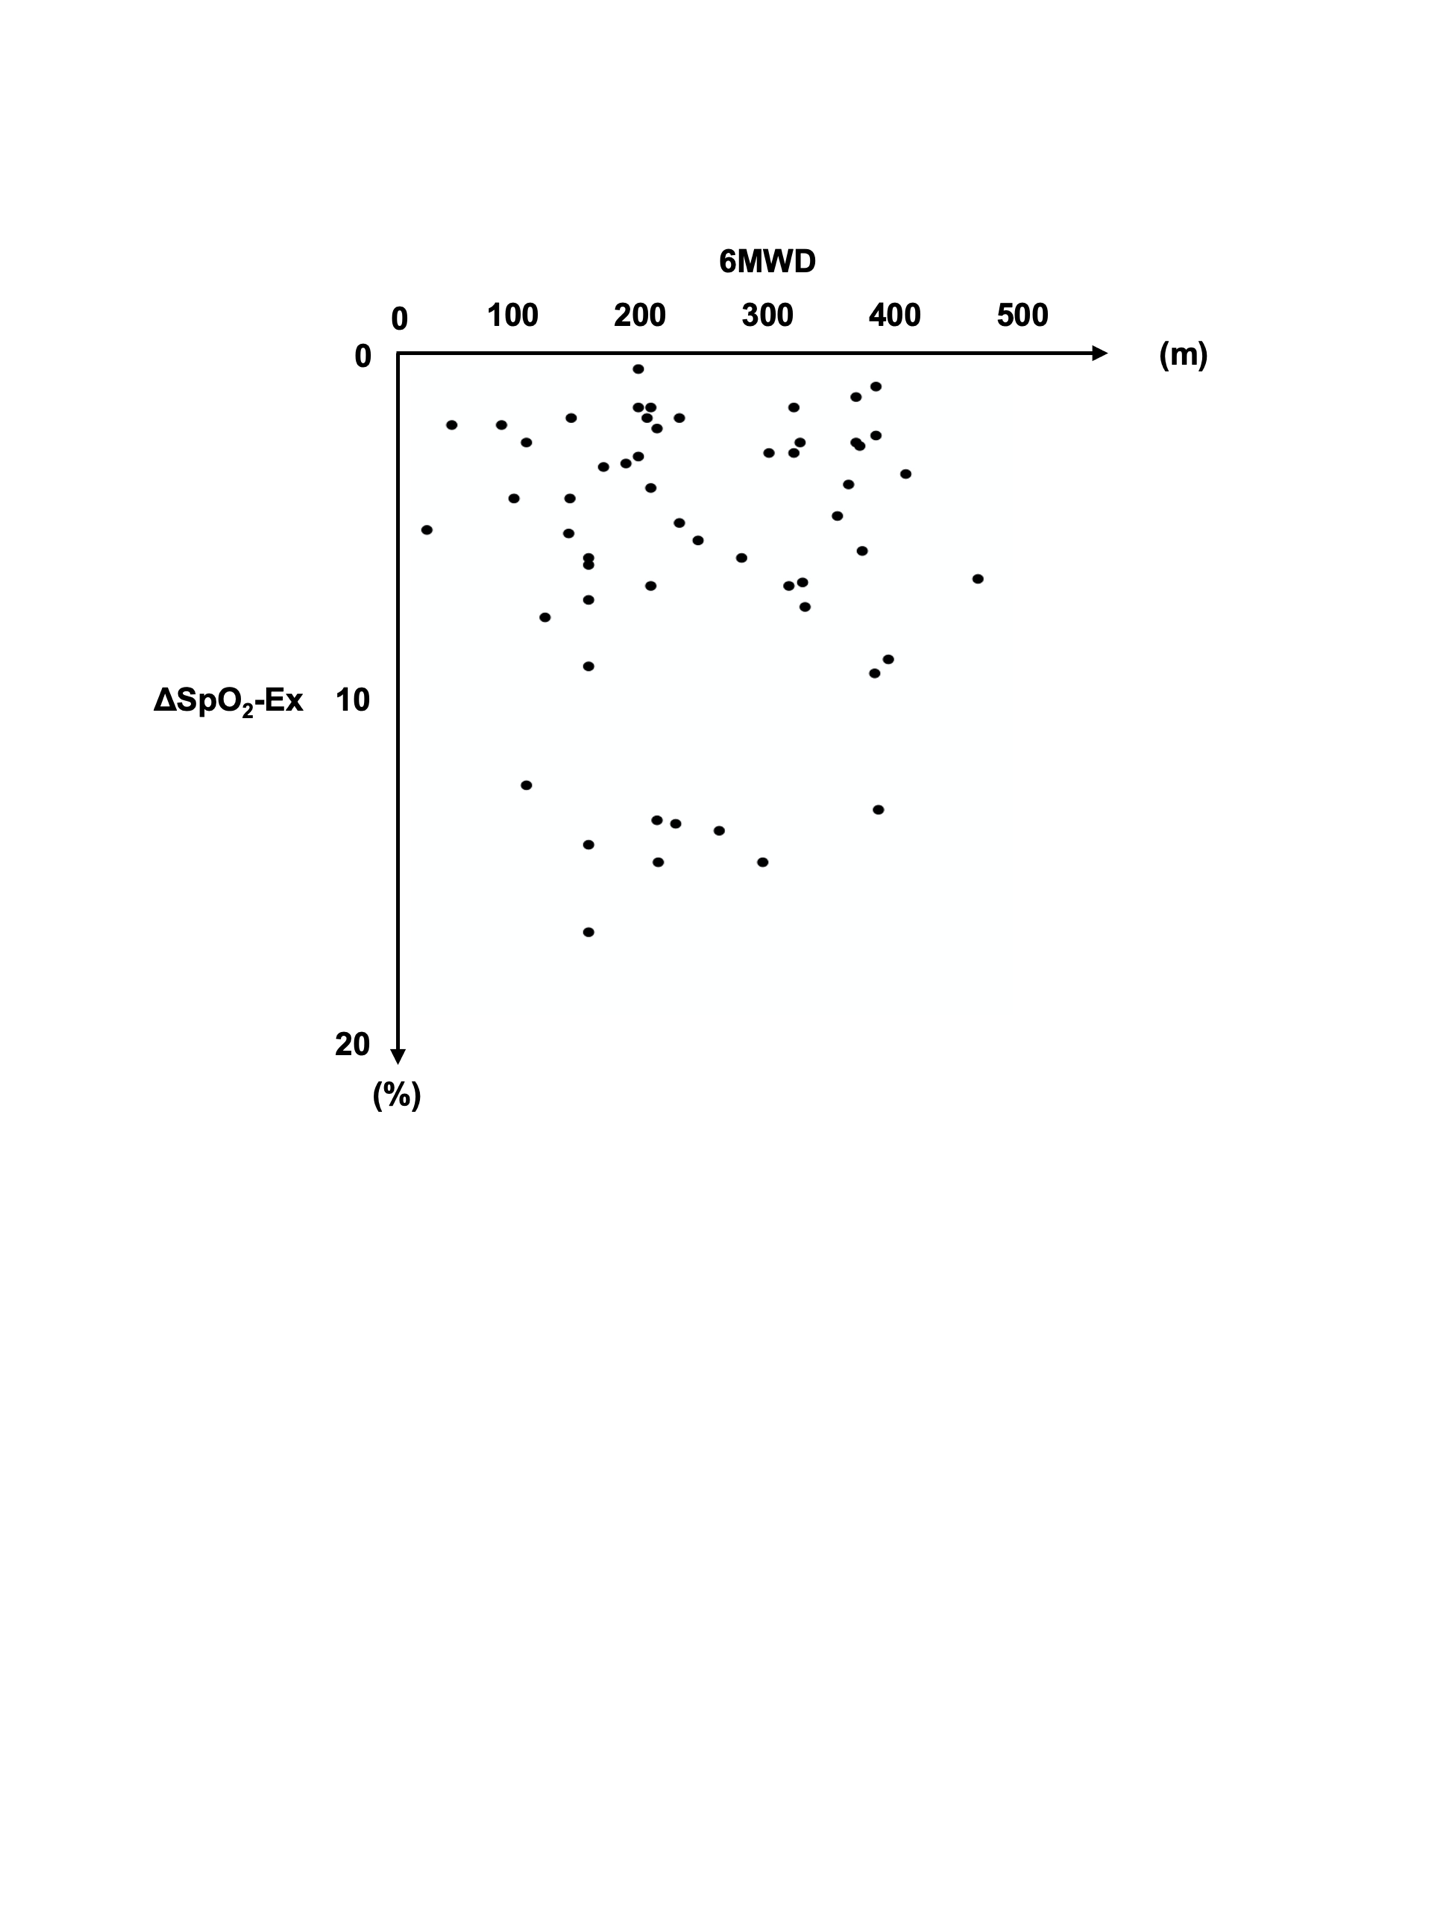
**

**Figure S1: The distribution of ΔSpO2-Ex levels and 6MWD**

There was no correlation between ΔSpO2-Ex and 6MWD (r=-0.04, p=0.782).

6MWD, Six-Minute Walk Distance; ΔSpO2-Ex, averaged decrease in peripheral oxygen saturation during exercise.
